# Supplementary material for: Structural rearrangements of the histone octamer translocate DNA
Source: PubMed Central journal article supplement (PMC5889399; doi:10.1038/s41467-018-03677-z), 2018-04-06
Supplement: 41467_2018_3677_MOESM1_ESM.pdf [file 41467_2018_3677_MOESM1_ESM.pdf]

# Structural rearrangements of the histone octamer translocate DNA

Bilokapic *et al.*

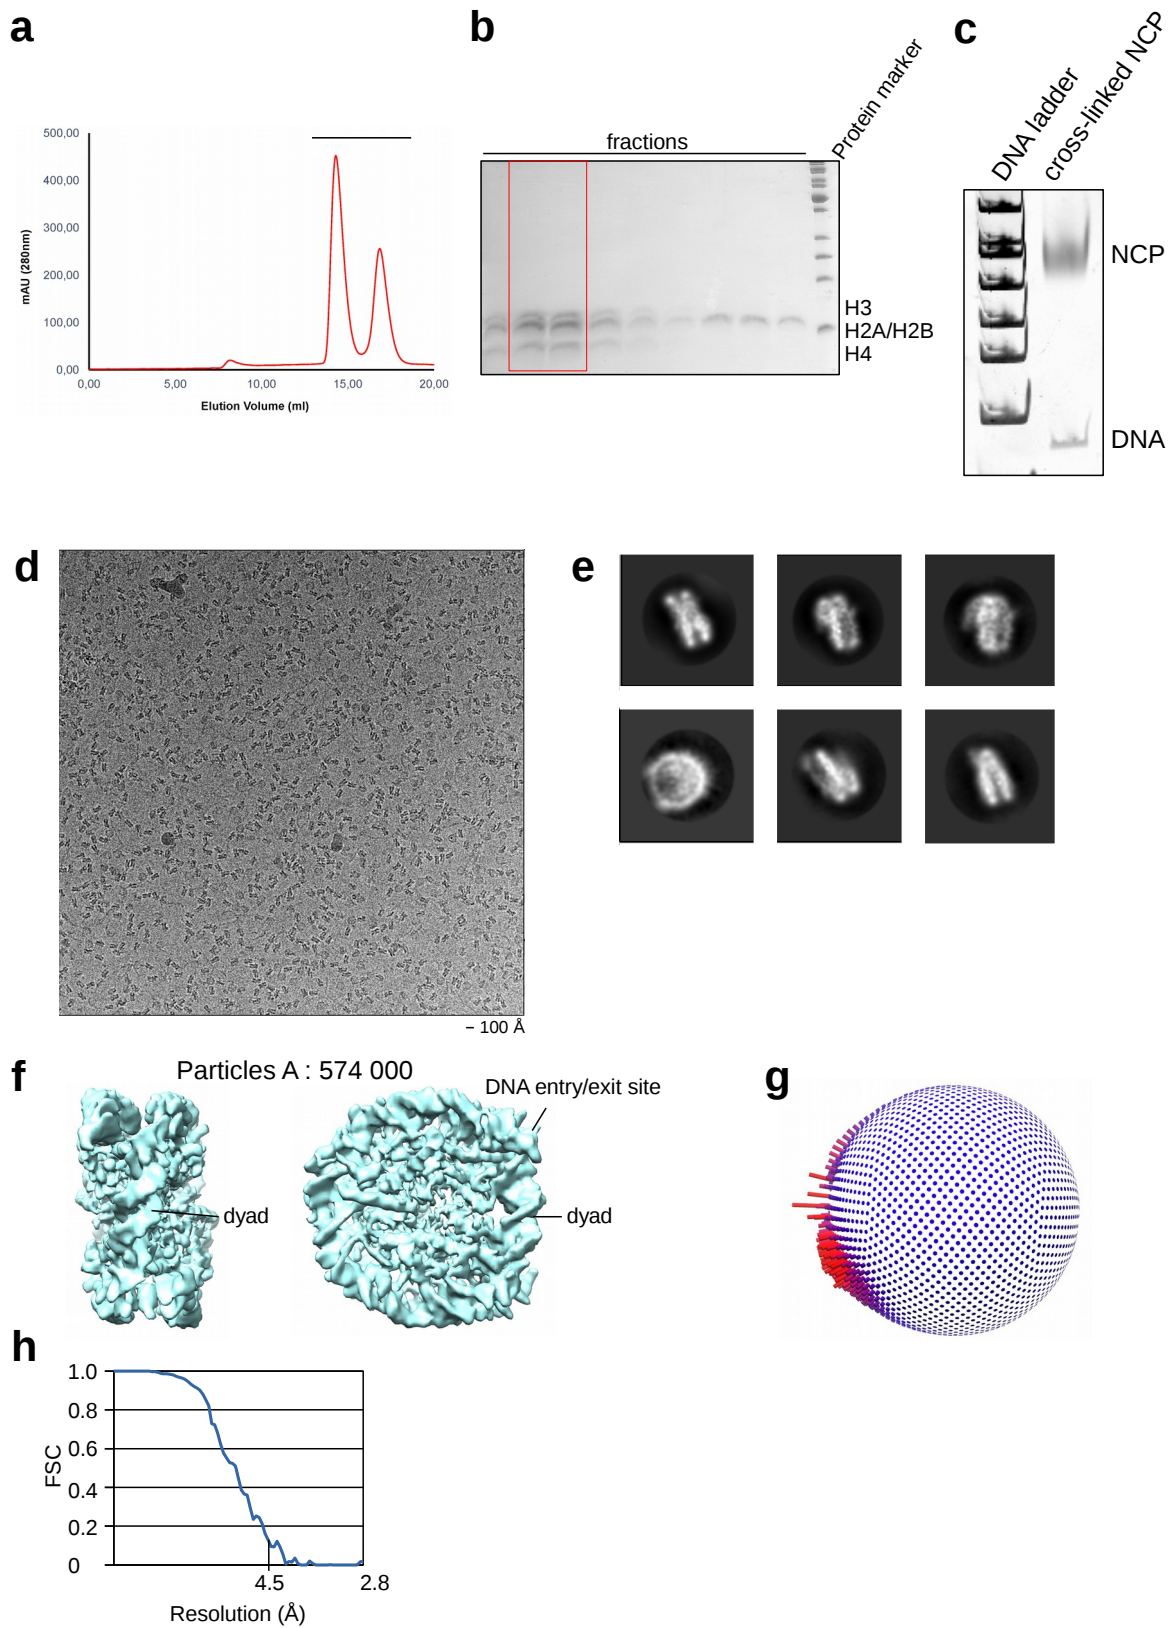

**Supplementary Figure 1**

### **Supplementary Figure 1. Cryo-EM reconstruction of the NCP**

- (a)** Chromatogram showing assembly of the histone octamer. Excess of H2A/H2B dimer, used in the octamer assembly, was removed by the size exclusion chromatography (red line).
- (b)** SDS-PAGE showing assembly of the histone octamer. Selected fractions of the assembled octamer, marked with a black bar on the chromatogram, were analyzed by SDS-PAGE. Fraction marked with red square were taken for the nucleosome reconstitution.
- (c)** Native gel showing the nucleosome assembly on 149 bp 601 DNA.
- (d)** Representative cryo-EM raw micrograph collected with Titan Halo electron microscope at 300 keV. NCPs in multiple orientations are clearly visible.
- (e)** Representative 2D class averages showing the nucleosome core particles in different orientations (side, tilted and top views). Many details are visible in 2D class averages.
- (f)** Cryo-EM map of the NCP at 4.5 Å (0.143 cutoff in FSC curve).
- (g)** Angular distribution for cryo-EM map of the NCP.
- (h)** Fourier shell correlation (FSC) curve showing the resolution of cryo-EM map of the NCP.

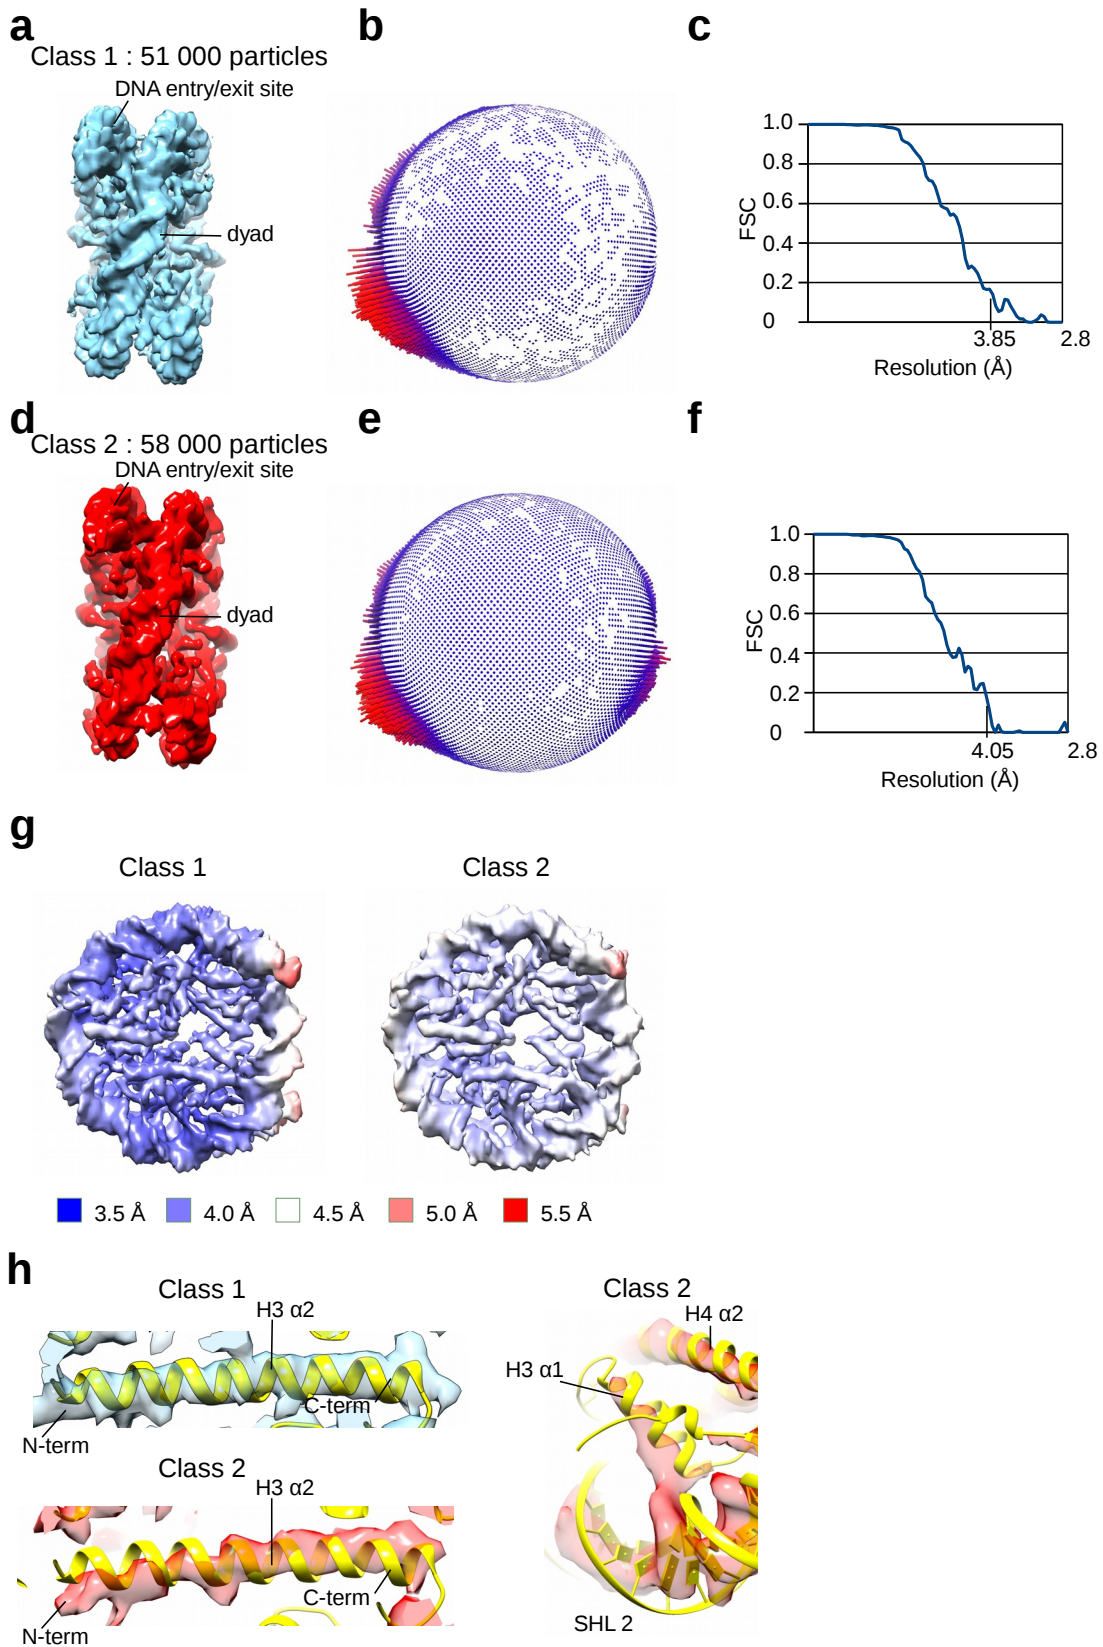

**Supplementary Figure 2**



## **Supplementary Figure 2. Classification of the nucleosome core particles**

- (a)** Cryo-EM map of the Class 1 NCP at 3.8 Å (0.143 cutoff in FSC curve).
- (b)** Angular distribution for the Class 1 cryo-EM map.
- (c)** Fourier shell correlation (FSC) curve showing the resolution of the Class 1 cryo-EM map.
- (d)** Cryo-EM map of the Class 2 NCP at 4.0 Å (0.143 cutoff in FSC curve).
- (e)** Angular distribution for the Class 2 cryo-EM map.
- (f)** Fourier shell correlation (FSC) curve showing the resolution of the Class 2 cryo-EM map.
- (g)** Local resolution estimate in Relion.
- (h)** The H3  $\alpha$ 1, H3  $\alpha$ 2 and the DNA at SHL 1.5 moved in Class 2. The X-ray model (PDB ID 3LZ1, yellow) does not fit well into the cryo-EM density.

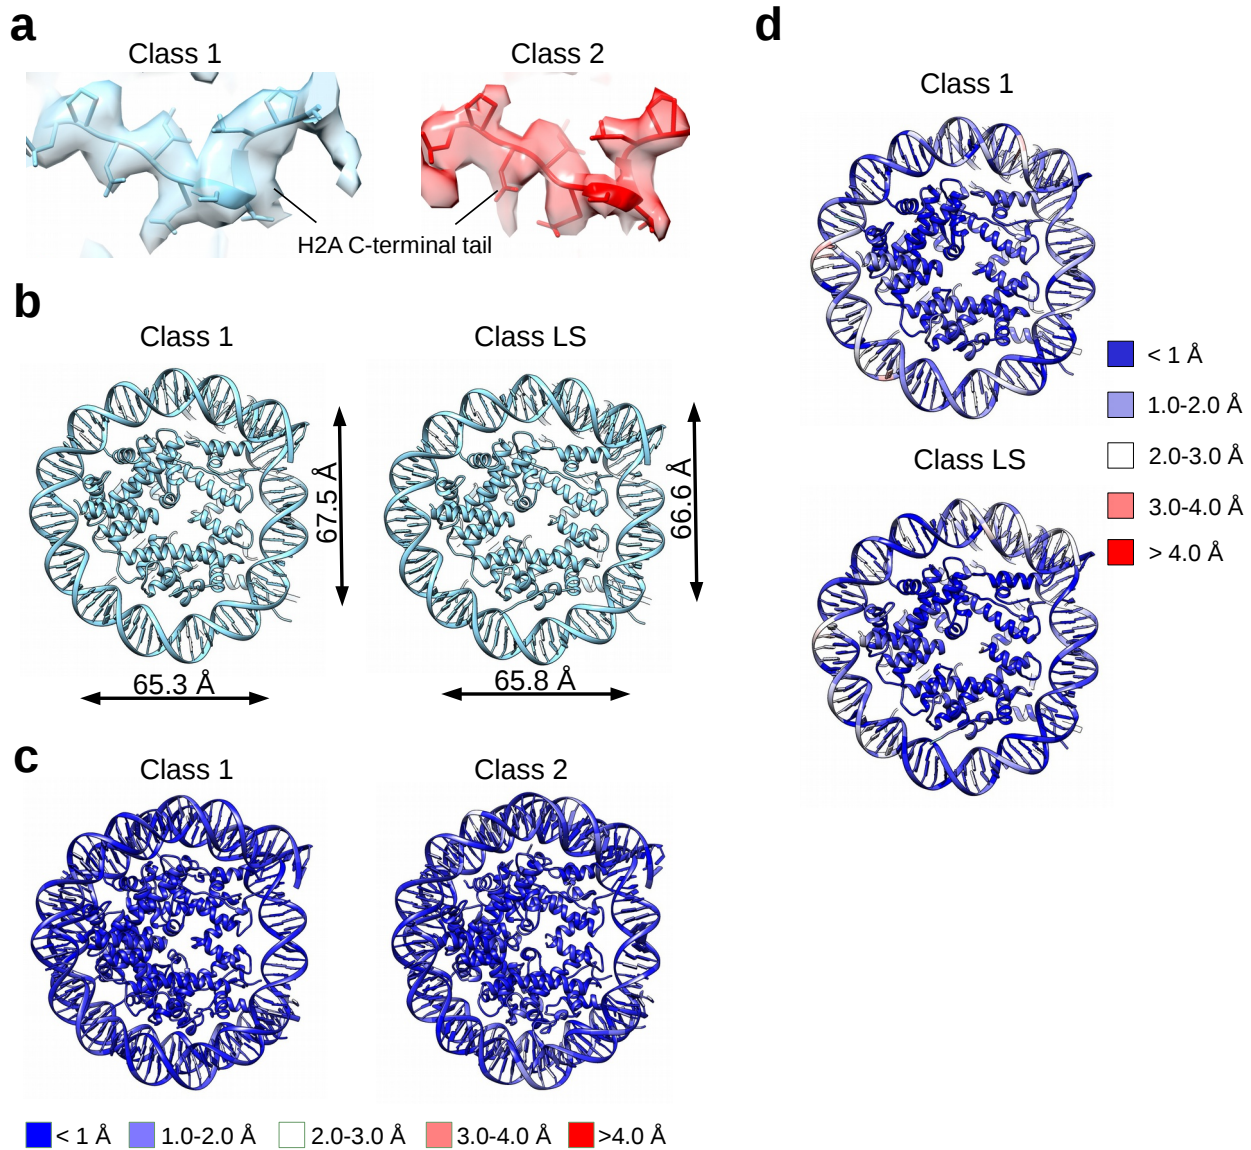

**Supplementary Figure 3**

### **Supplementary Figure 3. Fitting of the X-ray model into cryo EM maps**

**(a)** The X-ray structure of the NCP (PDB:3LZ1) was refined into the Class 1 and Class 2 cryo EM maps. Molecular model for each class is fitted to the corresponding cryo EM map showing that side chains are resolved in the histone core. H2A C-terminal tail is shown.

**(b)** Global changes in the nucleosome structure. Comparison of Class 1 and Class LS models. The nucleosome in Class 1 and Class LS is similar to the X-ray structures.

**(c)** RMSD ( $C\alpha$ ) between the half1 and half2 models for the Class 1 and the Class 2 half models. Deviation between two models from half data sets is less than 0.5 Å for most regions of Class 1 and Class 2 models.

**(d)** RMSD between the X-ray structure (PDB:3LZ1) and the Class 1 or Class LS models, showing the extent of rearrangements in the NCP. The X-ray structure was superimposed with the Class 1 and Class LS models and RMSD of  $C\alpha$  were calculated and depicted. Class 1 and Class LS are overall similar to the canonical nucleosome structure. Class 1 shows slight distortion.

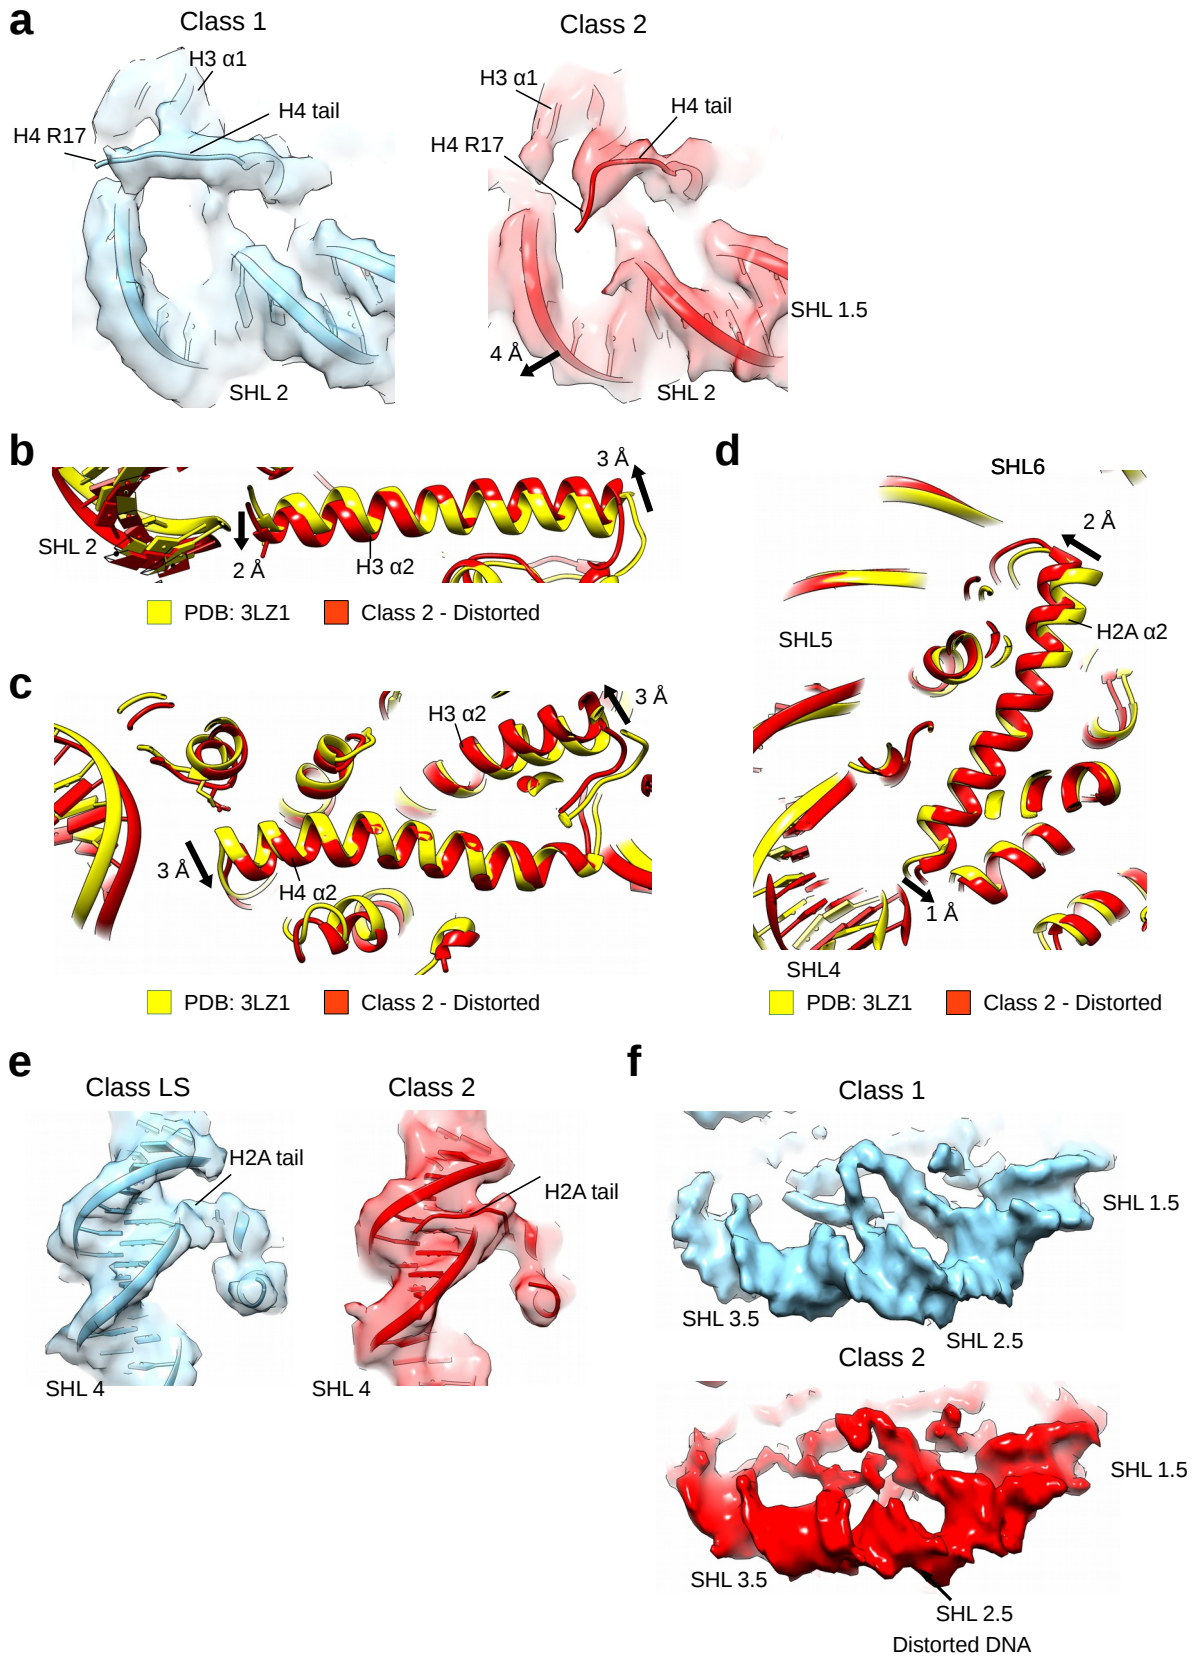

**Supplementary Figure 4**

#### **Supplementary Figure 4. Structural rearrangements in the histone octamer**

**(a)** In Class LS and Class 1, the H4 N-terminal tail interacts with the DNA phosphate backbone, most likely with positively charged K16 or R17. In Class 2, the DNA slides away more than 4 Å. This detaches the H4 tail from the DNA. In Class 2, the H4 tail is less defined and inserts into the major groove at SHL 2.

**(b)** Comparison of the X-ray structure (PDB:3LZ1, yellow) and the Class 2 model (red). Arrows depict the direction of the helix movements. The degree of movement between X-ray structure and the Class 2 model is shown, rounded to half an Å.

Conformational rearrangement of the H3  $\alpha 2$ . H3  $\alpha 2$  tilts in Class 2 by 2 Å at SHL 2 when compared to the X-ray structure (PDB:3LZ1). This also moves the DNA at SHL 2 for 3 Å outward. At the dyad, the H3  $\alpha 2$  moves 3 Å inward.

**(c)** Conformational rearrangement of the H4  $\alpha 2$ . The H4  $\alpha 2$  bends outward at SHL 2.5 for 3 Å to accommodate for the nucleosome contraction along the symmetry axis.

**(d)** Conformational rearrangement of H2A  $\alpha 2$ . The H2A  $\alpha 2$  tilts and moves inward 1 Å at SHL 3.5. H2A  $\alpha 2$  moves 2 Å outward at SHL 5.5. The DNA at SHL 3.5 is pulled 1 Å in direction of the nucleosome center. At SHL 5 the DNA is pushed 2 Å away from the nucleosome center.

**(e)** The H2A N-terminal tail is flexible in the Class LS. In Class 2, the H2A tail is inserted into SHL 4.5. In Class 2, histone octamer contracts along the symmetry axis.

**(f)** Close up view at SHL 2.5 in cryo EM maps. In the Class 1 map, the DNA at SHL 2.5 is defined and resembles a B-DNA helix. In the Class 2 map, the DNA at SHL 2.5 is undefined and does not resemble a B-DNA helix indicating distortion of the DNA. At SHL 1.5 and SHL 3.5, the DNA in Class 2 map resembles a B-DNA helix.



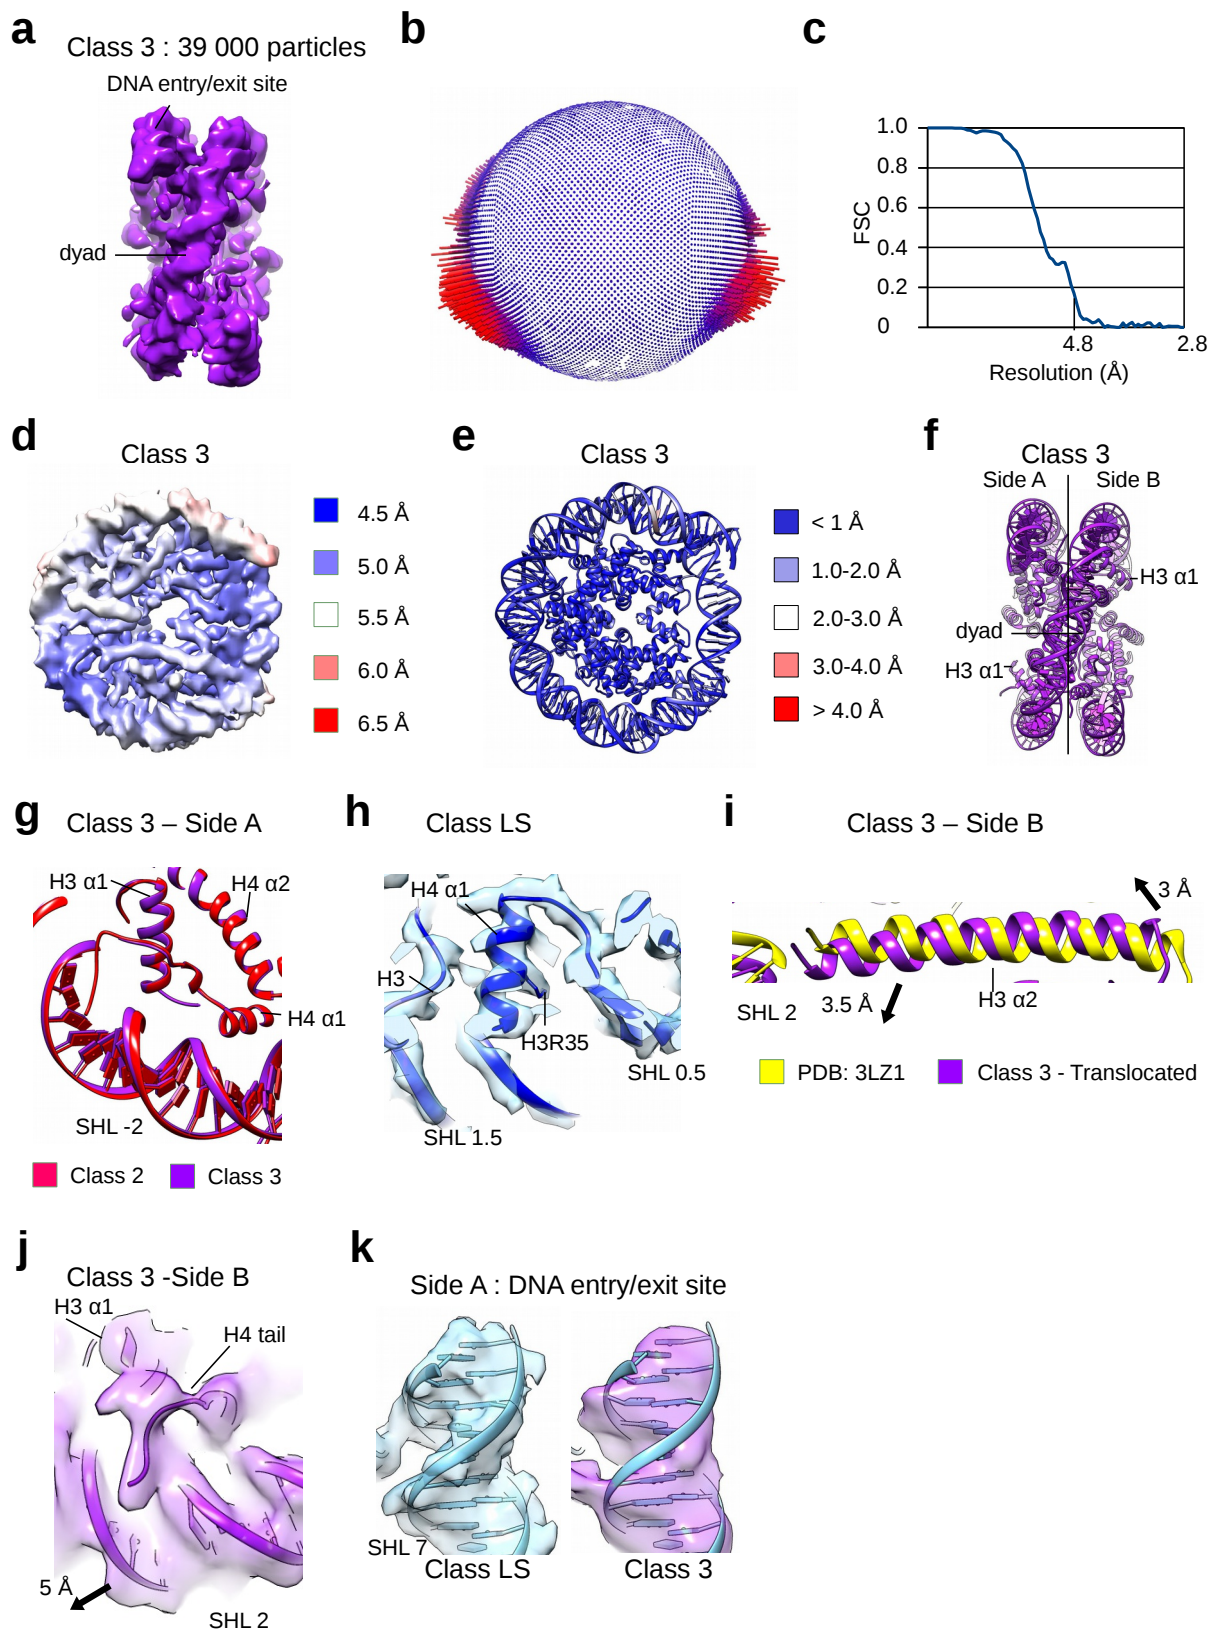

**Supplementary Figure 5**



## **Supplementary Figure 5. Conformational changes in the histone octamer translocate DNA**

- (a)** Cryo-EM map of the NCP Class 3 at 4.8 Å (0.143 cutoff in FSC curve). Class 3 contains 39 000 particles. The NCP is shown in purple.
- (b)** Angular distribution for the Class 3 cryo-EM map.
- (c)** Fourier shell correlation (FSC) curve showing the resolution of the Class 3 cryo-EM map.
- (d)** Local resolution estimate in Relion for Class 3 cryo EM map.
- (e)** RMSD ( $C\alpha$ ) between the half1 and half2 models for the Class 3 half models. Deviation between two models from half data sets is less than 1 Å for most regions of Class 3 models.
- (f)** Side A and B are depicted on the Class 3 model.
- (g)** Comparison of the nucleosome models for cryo EM maps Class 2 (red) and Class 3, side A (purple).
- (h)** Fitting of the Class LS (blue) model into cryo EM map. The Class LS map is shown in blue. The H4  $\alpha$ 1 interacts with the DNA at SHL 1.5. H4R35 does not make a contact with the DNA at SHL 0.5.
- (i)** Comparison of the X ray structure (PDB:3LZ1, yellow) and the Class 3 model (purple). Arrows depict the direction of the helix movements. The H3  $\alpha$ 2 tilts 3.5 Å at SHL 2.5 and 3 Å in the opposite direction at the dyad.
- (j)** In Class 3, the DNA slides away more than 5 Å. This detaches the H4 tail from the DNA. Similar to Class 2, in Class 3 H4 tail inserts into the major groove at SHL 2.
- (k)** The model for Class LS\_C1 (Class LS reconstructed with C1 symmetry) was fitted into Class LS\_C1 and Class 3 cryo EM maps. DNA entry/exit site of Class 3 and Class LS is shown.

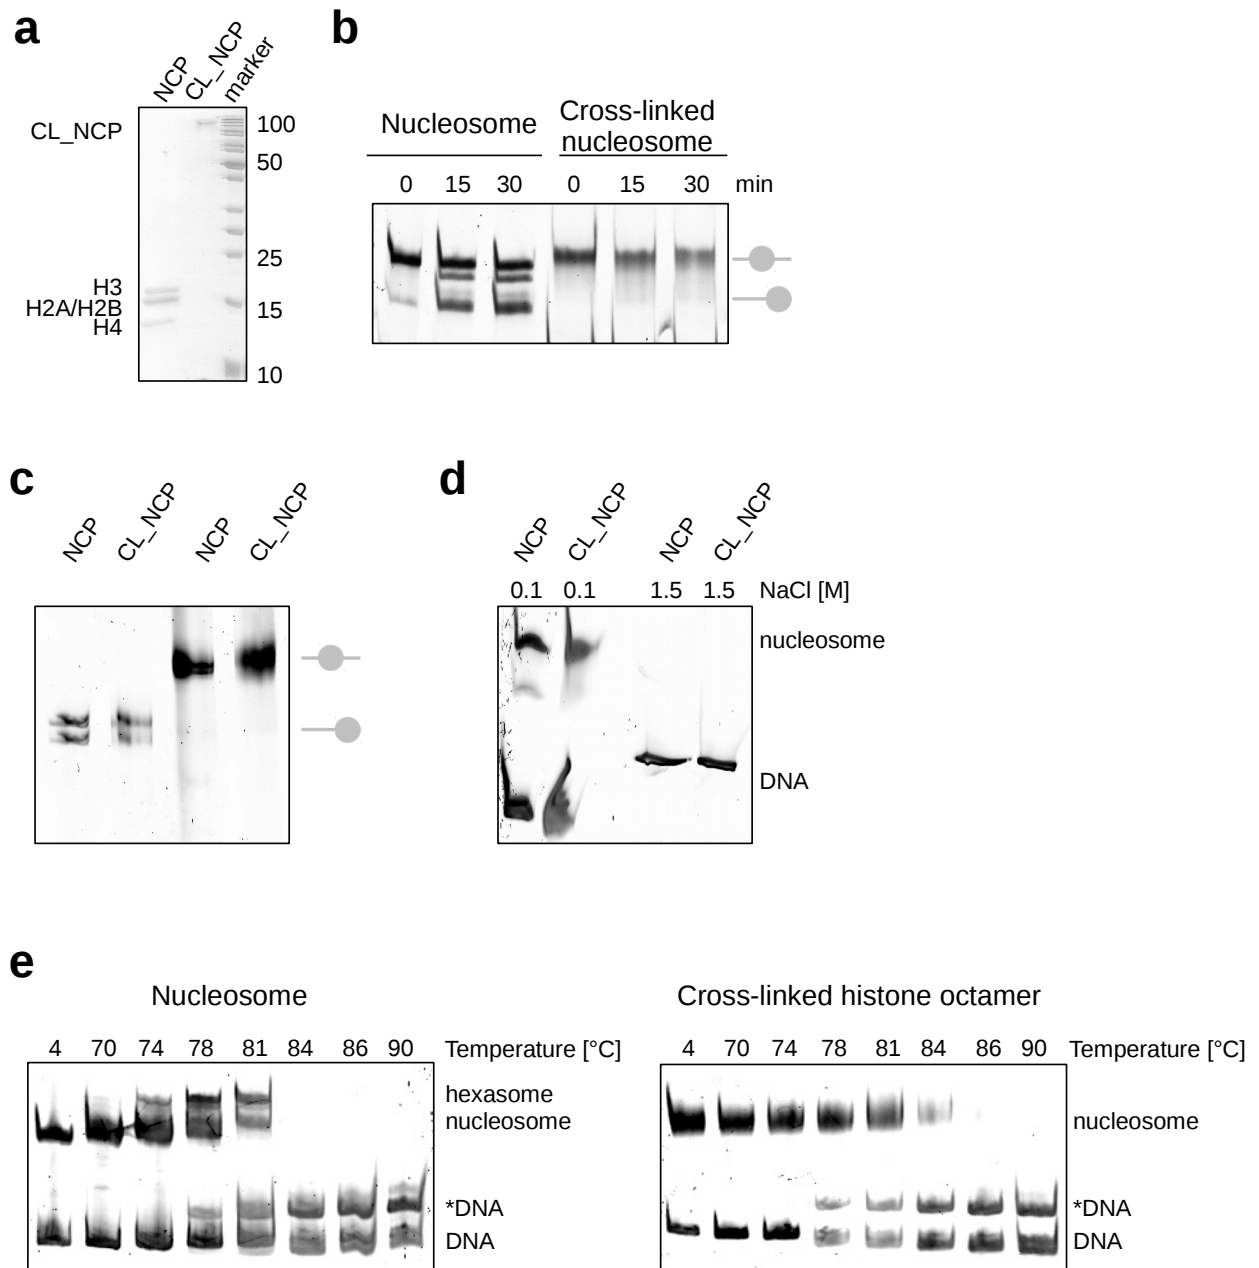

**Supplementary Figure 6**

**Supplementary Figure 6. Conformational rearrangement of the histone octamer is required for the nucleosome sliding**

**(a)** SDS PAGE showing that the histone octamer is cross-linked and migrates at ~100 kDa.

**(b)** Thermal mobilization of nucleosomes on 227 bp DNA sequence containing strong positioning 601 sequence in the middle. Native nucleosomes are re-positioned at 60 °C. Nucleosomes with cross-linked histone octamer did not move.

**(c)** Native gel showing migration of native and cross-linked nucleosomes assembled on 227 bp DNA containing 601 sequence either at the end (0-601-80; left) or in the center (40-601-40; right). Cross-linking of the nucleosome does not change the nucleosome migration.

**(d)** Salt induced disassembly of native and cross-linked nucleosomes assembled on 227 bp 601 DNA sequence. Cross-linked nucleosomes disassemble at elevated salt concentration indicating that histone octamer did not cross-link with the DNA.

**(e)** Temperature induced disassembly of native and cross-linked nucleosomes assembled on 149 bp 601 DNA sequence. Both, native and cross-linked nucleosomes, disassemble at increased temperature.

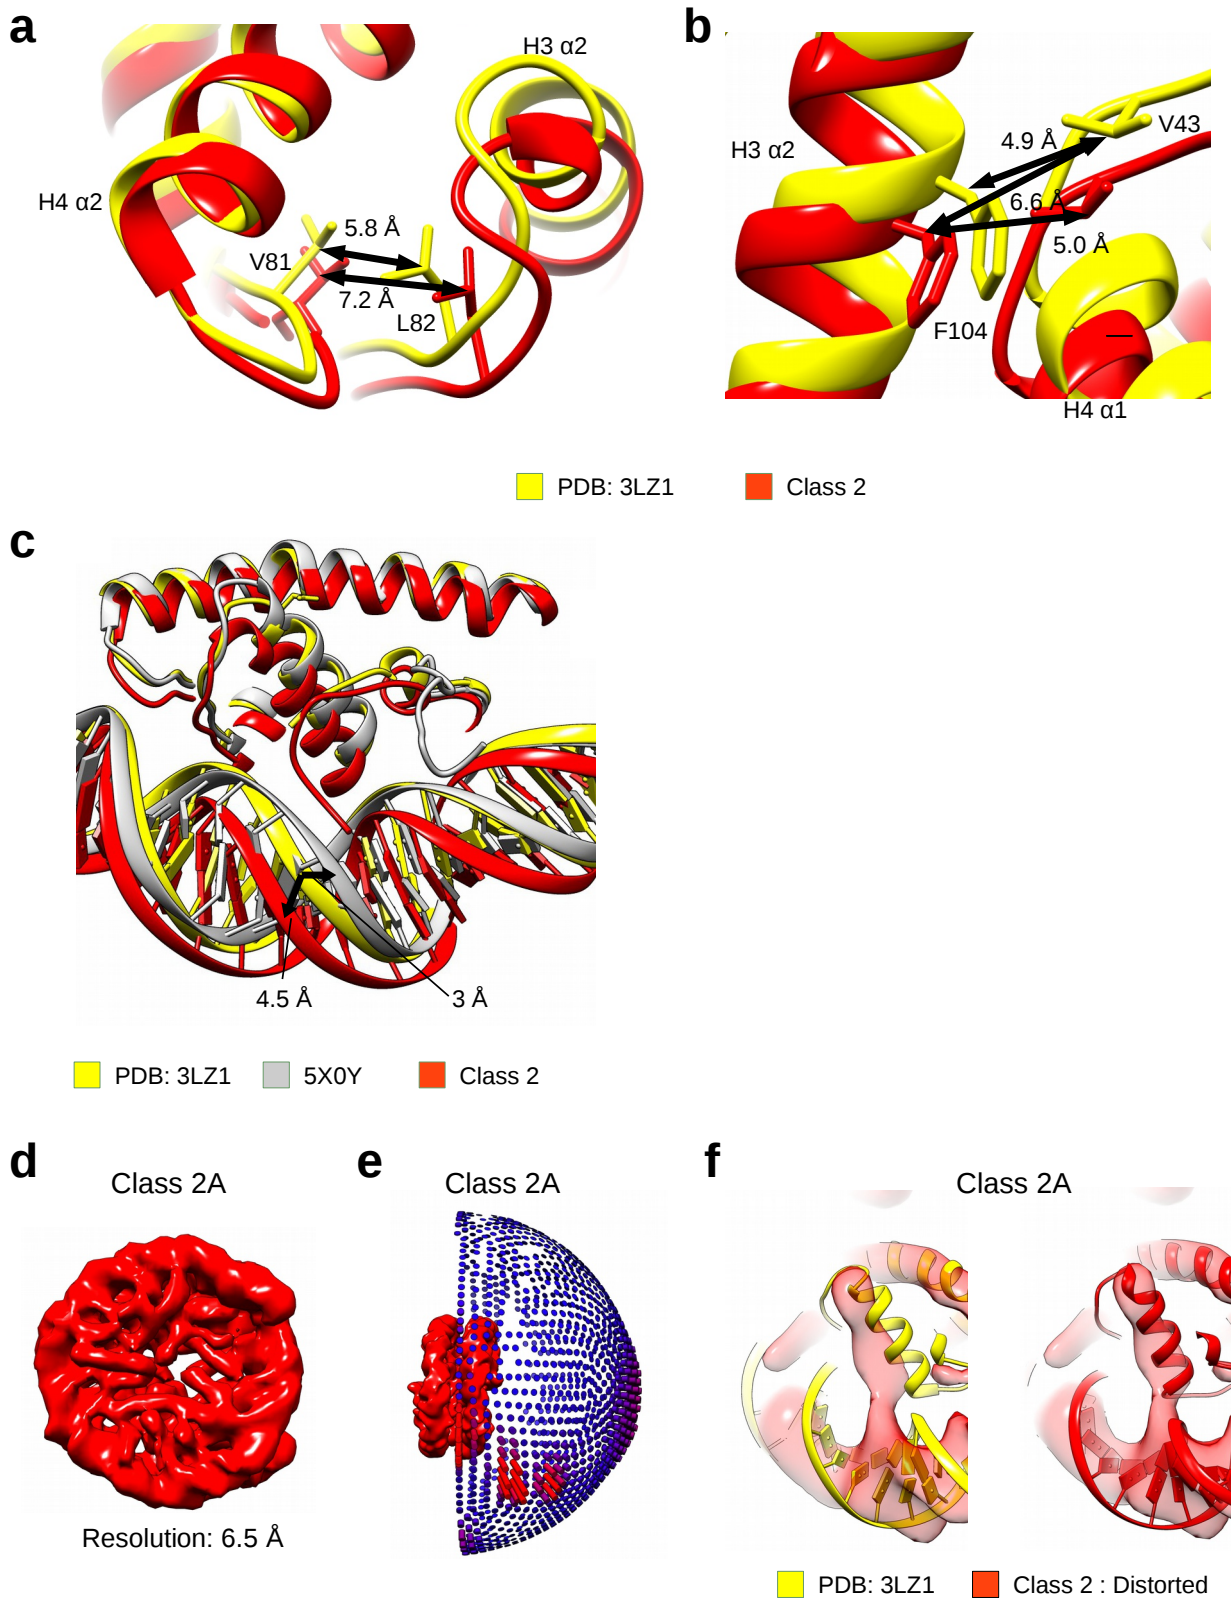

Supplementary Figure 7

### **Supplementary Figure 7. Comparison with existing data**

- (a)** The distance ( $C\beta$ ) between H3 L82 and H4 V81 is 5.8 Å in the X-ray structure. In the Class 2 map, the distance is increased to 7.2 Å.
- (b)** The distance ( $C\beta$ ) from H3 F104 to H4 V43 is 5.0 Å in the X-ray structure. In the Class 2 map, the distance is increased.
- (c)** Comparison of the DNA movement between the X-ray, the Class 2 model and the Snf2-Nucleosome complex model (5X0Y). In the Class 2 structure we observe lateral movement of the DNA at SHL 2, while Snf2 pulls the DNA in perpendicular direction.
- (d)** Cryo-EM map of the NCP Class 2A at 6.5 Å (0.143 cutoff in FSC curve). Class 2A has 50 % of particles in disk orientation.
- (e)** Angular distribution for the Class 2A cryo-EM map. 50 % particles are in the disk orientation.
- (f)** The H3  $\alpha$ 1 and the DNA at SHL 1.5 (PDB ID 3LZ1, yellow) moved in the Class 2A map and the X-ray model does not fit well. The Class 2 model fits well in the Class 2A map. This excludes that distortion might be caused by the orientational bias.

**Figure 5a**

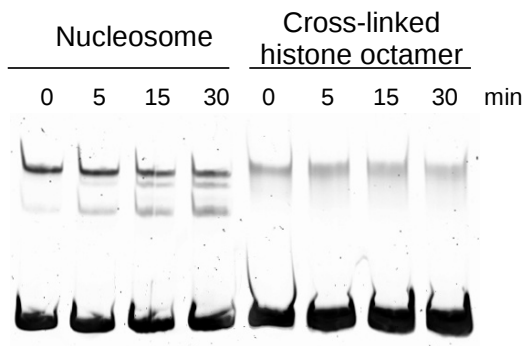

**Figure 5d**

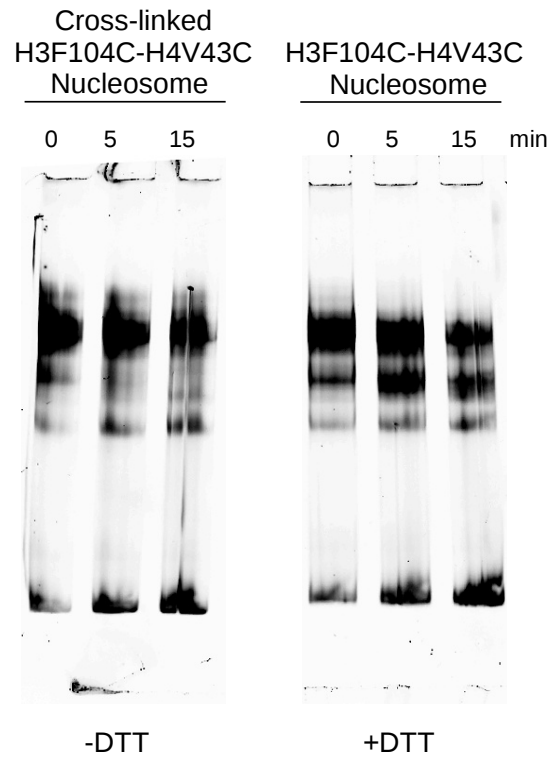

**Supplementary Figure 6b**

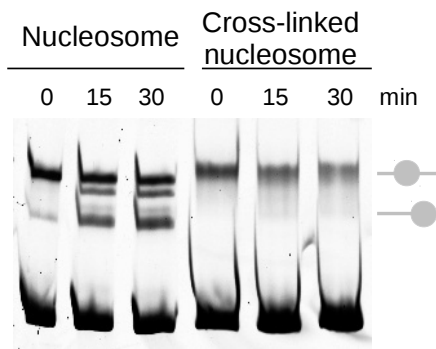

**Supplementary Figure 6c**

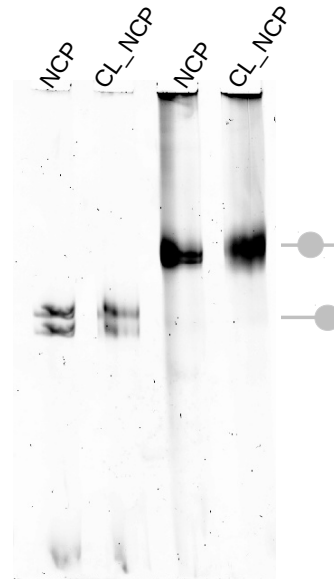

**Supplementary Figure 8**

**Supplementary Figure 8. Unprocessed gels**



**Supplementary Table 1: Oligonucleotides used in this study**

| OLIGONUCLEOTIDES                       | SEQUENCE             |
|----------------------------------------|----------------------|
| 149 bp 601 DNA                         |                      |
| 423F                                   | GCACAGGATGTATATATCTG |
| 423R                                   | CTGGAGAATCCCGGT      |
| 227 bp 601 DNA (+- 40 bp on each side) |                      |
| 797F                                   | TATCCGACTGGCACCG     |
| 797R                                   | GAGTTCATCCCTTATGTGAT |
| 227 bp 601 DNA (+80 bp on one side)    |                      |
| 423F                                   | GCACAGGATGTATATATCTG |
| 1228R                                  | GGATCCTAATGACCAAGG   |
